# Supplementary material for: The Persistence of Staphylococcus aureus in Pressure Ulcers: A Colonising Role
Source: MDPI journal article supplement (doi:10.3390/genes12121883), 2021-11-25
Supplement: s1 [file s1]

Supplementary data

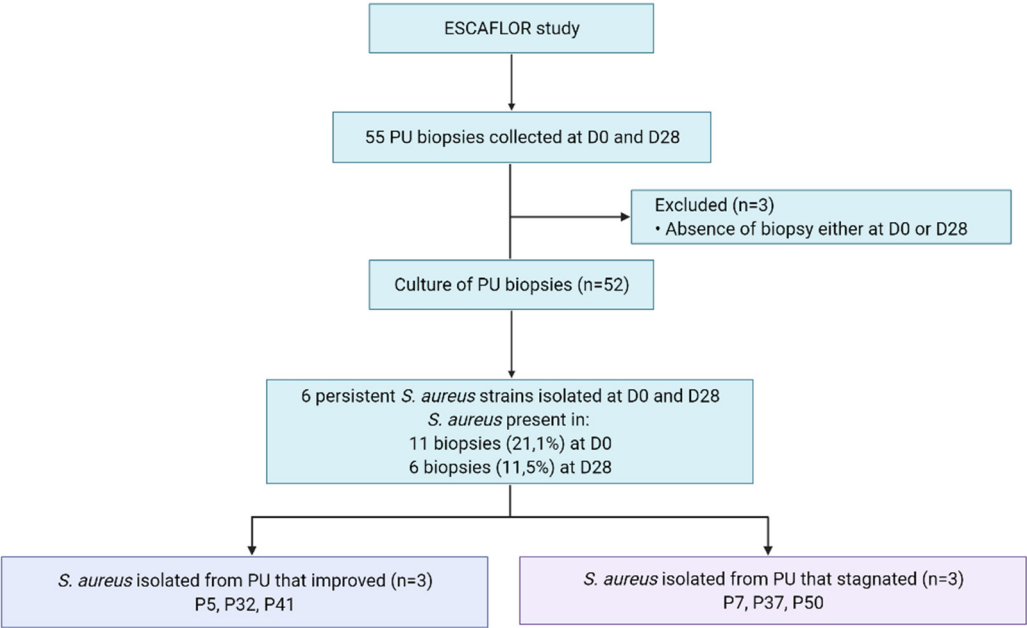

Figure S1: Flow chart of the ESCAFLO Study.

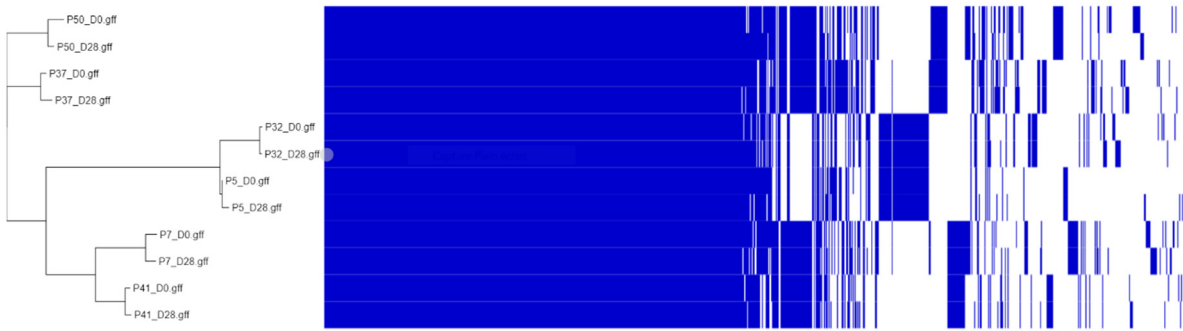

Figure S2: Genome-wide representation of the 12 studied *S. aureus* strains isolated from pressure ulcers at D0 and D28.

**Table S1:** Summary of the Whole Genome Sequencing bio-informatic analysis.

| Feature | Genome size (bp) | Number contigs | G+C Content (%) | Number CDS | Reference sequence used for consensus<br>(GenBank Accession Number) | GenBank Accession Number |
|---------|------------------|----------------|-----------------|------------|---------------------------------------------------------------------|--------------------------|
| P5 D0   | 2,709,192        | 75             | 32.81           | 2585       | NC_017673.1                                                         | CP076568                 |
| P5 D28  | 2,710,927        | 69             | 32.81           | 2585       |                                                                     |                          |
| P7 D0   | 2,800,844        | 68             | 32.62           | 2710       | CP007657.1                                                          | CP076719-                |
| P7 D28  | 2,800,339        | 78             | 32.62           | 2707       |                                                                     | CP076720                 |
| P32 D0  | 2,676,228        | 63             | 32.78           | 2524       | NZ_CP040230.2                                                       | CP076567                 |
| P32 D28 | 2,679,349        | 69             | 32.77           | 2533       |                                                                     |                          |
| P37 D0  | 2,754,646        | 42             | 32.73           | 2625       | CP007657.1                                                          | CP077199-                |
| P37 D28 | 2,754,500        | 46             | 32.73           | 2625       |                                                                     | CP077200                 |
| P41 D0  | 2,695,301        | 102            | 32.66           | 2540       | CP026068.1                                                          | CP076565                 |
| P41 D28 | 2,695,171        | 116            | 32.66           | 2560       |                                                                     |                          |
| P50 D0  | 2,816,720        | 67             | 32.75           | 2732       | CP030547.1                                                          | CP076564                 |
| P50 D28 | 2,803,529        | 63             | 32.75           | 2704       |                                                                     |                          |

**Table S2:** Growth profiles of *S. aureus* strains isolated from pressures ulcers at D0 and D28.

Ym (maximum absorbance), Y0 (initial absorbance), K (lag time, h-1), 1/K (inflection point, h), and the extrapolated linear equation of the exponential phase.

|         | Y0                        | Ym                       | K (h <sup>-1</sup> )     | 1/K (h)                  | Y = ax + b (r <sup>2</sup> ) |
|---------|---------------------------|--------------------------|--------------------------|--------------------------|------------------------------|
| P5 D0   | 0.141<br>(0.104 ; 0.181)  | 1.414<br>(1.388 ; 1.440) | 0.215<br>(0.193 ; 0.240) | 4.648<br>(4.172 ; 5.175) | y = 0.106x + 0.115 (1)       |
| P5 D28  | 0.135<br>(0.100 ; 0.172)  | 1.383<br>(1.359 ; 1.409) | 0.214<br>(0.193 ; 0.237) | 4.675<br>(4.212 ; 5.186) | y = 0.104x + 0.106 (1)       |
| P7 D0   | 0.133<br>(0.099 ; 0.171)  | 1.390<br>(1.357 ; 1.426) | 0.165<br>(0.147 ; 0.184) | 6.071<br>(5.434 ; 6.792) | y = 0.082x + 0.087 (1)       |
| P7 D28  | 0.148<br>(0.100 ; 0.200)  | 1.401<br>(1.359 ; 1.446) | 0.175<br>(0.150 ; 0.203) | 5.732<br>(4.925 ; 6.676) | y = 0.086x + 0.122 (1)       |
| P32 D0  | 0.127<br>(0.096 ; 0.161)  | 1.302<br>(1.280 ; 1.325) | 0.219<br>(0.199 ; 0.242) | 4.565<br>(4.140 ; 5.031) | y = 0.099x + 0.103 (1)       |
| P32 D28 | 0.117<br>(0.088 ; 0.149)  | 1.273<br>(1.252 ; 1.295) | 0.219<br>(0.199 ; 0.241) | 4.566<br>(4.149 ; 5.021) | y = 0.097x + 0.086 (1)       |
| P37 D0  | 0.128<br>(0.102 ; 0.156)  | 1.408<br>(1.388 ; 1.430) | 0.204<br>(0.188 ; 0.221) | 4.905<br>(4.526 ; 5.314) | y = 0.103x + 0.079 (1)       |
| P37 D28 | 0.131<br>(0.105 ; 0.158)  | 1.404<br>(1.384 ; 1.425) | 0.202<br>(0.187 ; 0.218) | 4.950<br>(4.581 ; 5.348) | y = 0.101x + 0.085 (1)       |
| P41 D0  | 0.123<br>(0.0898 ; 0.160) | 1.347<br>(1.318 ; 1.378) | 0.188<br>(0.168 ; 0.210) | 5.321<br>(4.766 ; 5.941) | y = 0.081x + 0.092 (1)       |
| P41 D28 | 0.124<br>(0.084 ; 0.169)  | 1.383<br>(1.351 ; 1.418) | 0.206<br>(0.181 ; 0.236) | 4.843<br>(4.245 ; 5.518) | y = 0.102x + 0.077 (1)       |
| P50 D0  | 0.177<br>(0.132 ; 0.226)  | 1.409<br>(1.372 ; 1.450) | 0.174<br>(0.152 ; 0.199) | 5.758<br>(5.034 ; 6.595) | y = 0.084x + 0.175 (1)       |
| P50 D28 | 0.196<br>(0.140 ; 0.257)  | 1.506<br>(1.464 ; 1.552) | 0.184<br>(0.158 ; 0.215) | 5.422<br>(4.660 ; 6.314) | y = 0.092x + 0.241 (1)       |
